# Supplementary material for: Novel menthol releaser derived from as-synthesized mesoporous silica
Source: Royal Society of Chemistry journal article supplement (doi:10.1039/c4ra13364a), 2014-12-15
Supplement: c4ra13364a1.pdf [file c4ra13364a1.pdf]

## Supprting Information

The instrument and condition used for the detection of menthol released from mesoporous silica vessels.

(1) Static style head space instrument: Agilent G1888 Network Headspace Sampler

Head space bottle: Agilent 5182-0837 Headspace vial, 20 mL, Flat Bottom

Sampling loop: 3.0 mL

The temperature for balancing sample

Sample loop temperature: 373 K

Transmission line temperature: 393 K

Sample balancing time: 30-60 min

Forcing pressure for sample bottle : 138 KPa

Clamping time: 0.2 min

Air inflation time: 0.2 min

Sampling loop equilibration time: optional

Sample injection time: 0.2 min

(2) Gas chromatography

a. VOCOL capillary column, 60 m×0.32 mm×1.8 μm (film thickness)

b. carrier gas: Henium

c. injection port: split ratio 10:1, 423 K

d. column flow: constant flow, 0.2 mL/min

e. temperature programmed: 313 K, kept for 2 min, then heated with the rate of 4 K/min to 453 K and kept for 10 min.

(3) PerkinElmer Clarus 600T Mass Spectrometer

a. Scan modle : 30-350

b. Assist port temperature: 493 K

c. Ion source temperature: 503 K

d. Quadrupole temperature: 423 K

e. Solvent delay: 4.0 min

f. Ionization Mode: EI+

g. Scan Time: 0.3

h. Inter-Scan Delay: 0.05

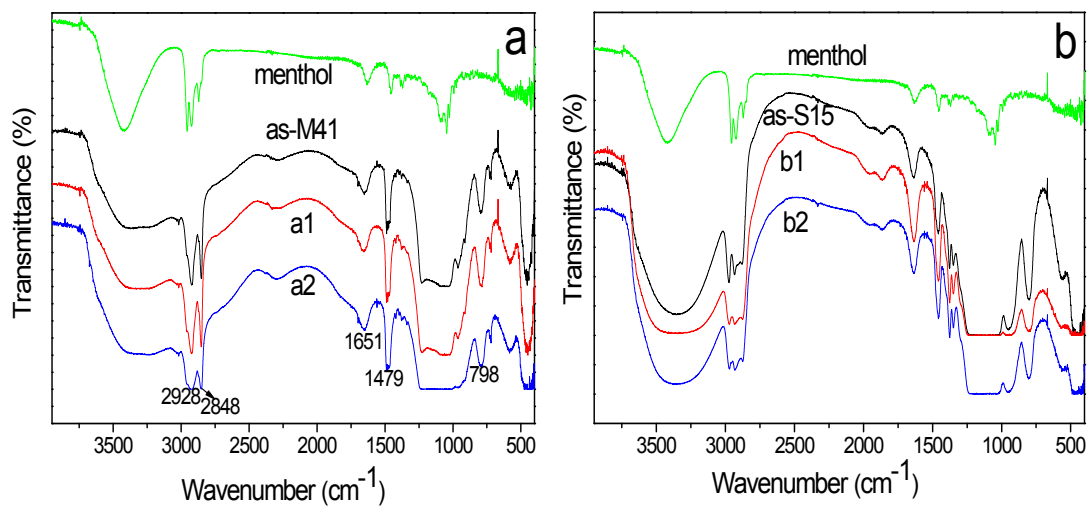

**Fig S1.** FT-IR spectra of (a) as-M41, (b) as-S15 and their analogues, a1 and b1 (adsorbed menthol at 373 K and opened stored at embinet for 2 days), and a2 and b2 samples (adsorbed at 373 K and purged with nitrogen for 1h).

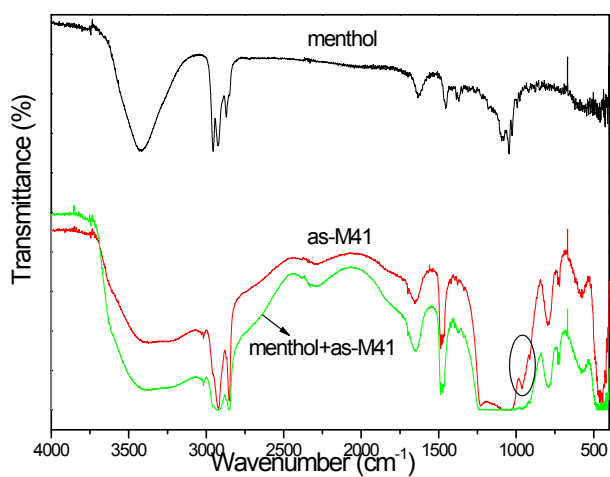

**Fig S2.** The FT-IR spectrum of menthol, as-M41, and the mixture of as-M41 and menthol (30 wt.-%).

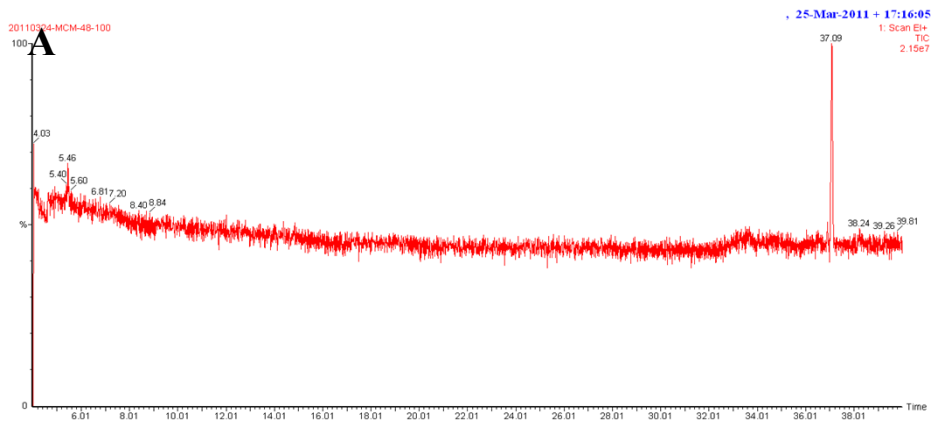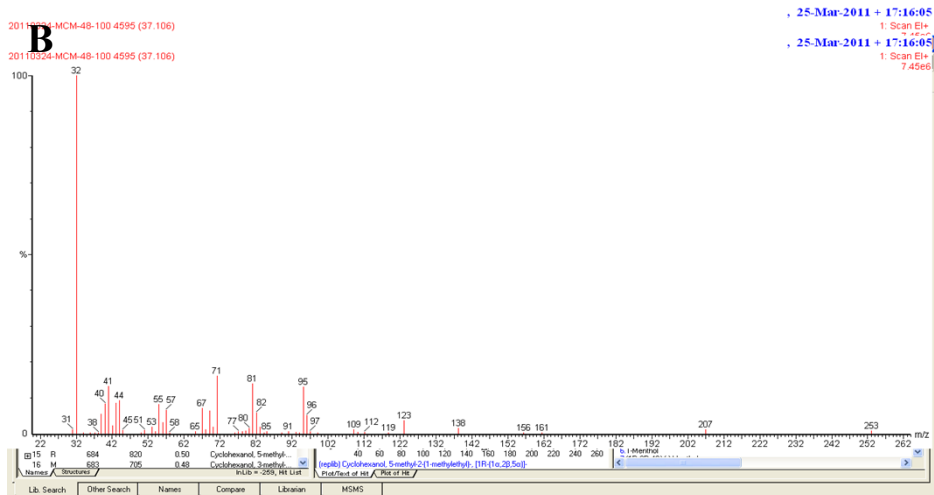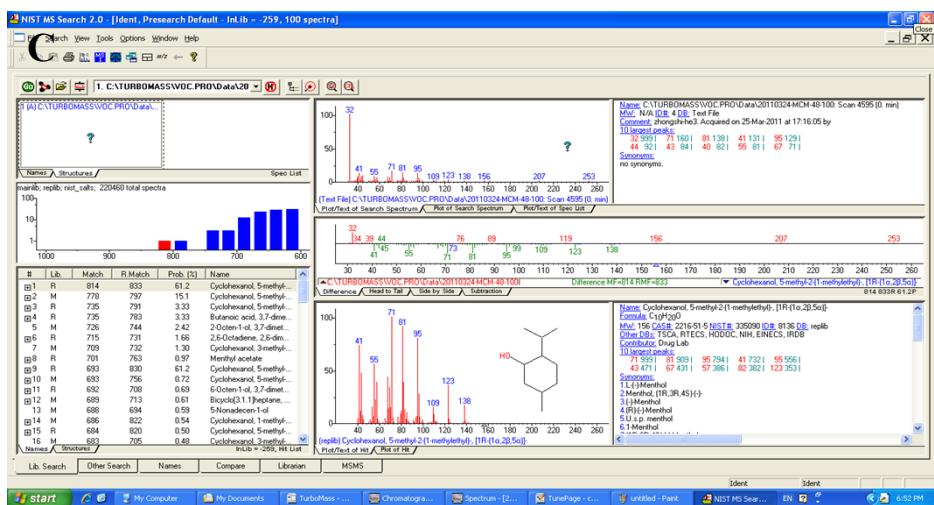

Fig. S3. A) GC spectrum, B) MS spectrum of the released menthol from as-M48 loaded with menthol in 373 K and C) fitting with the standard spectrum of menthol.
